# Supplementary material for: Deposition of a cutin apoplastic barrier separating seed maternal and zygotic tissues
Source: Springer Nature journal article supplement (doi:10.1186/s12870-019-1877-9), 2019-07-10
Supplement: MOESM1 [file 12870_2019_1877_MOESM1_ESM.pdf]

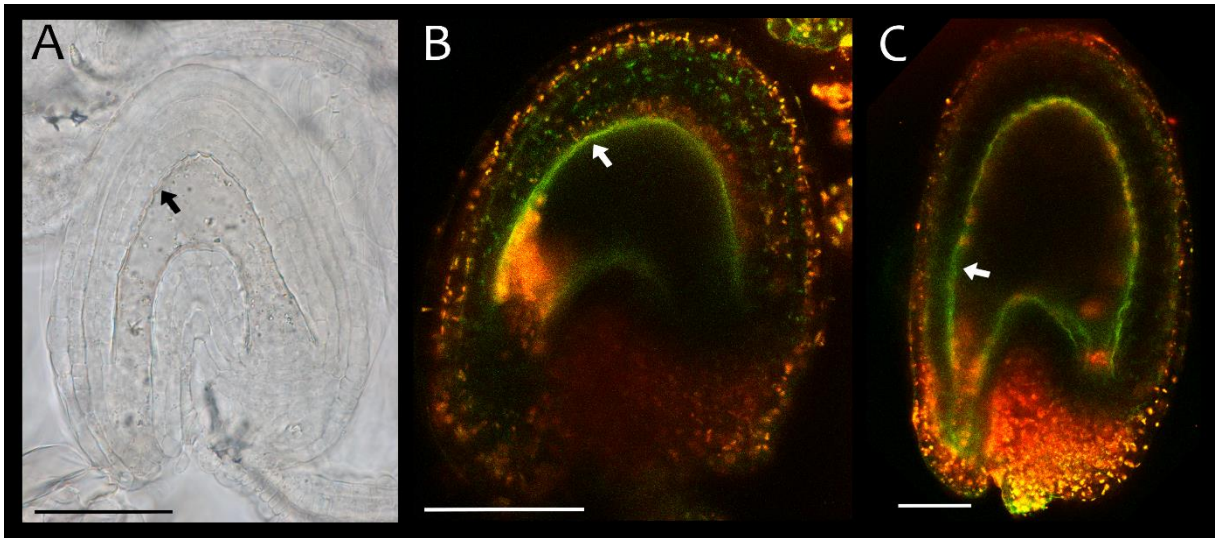

**Additional file 1: Figure S1.** Detection of the IAB without staining.

**(A)** Wild type seed analyzed using DIC microscopy.

**(B)** and **(C)** Auto-fluorescence images of wild type seeds. Excitation was performed at 488nm. Fluorescence was collected between 490nm and 530nm for the green channel and between 600nm and 700nm for the red channel.

Black and white arrows show the IAB. Ecotype Col. Scale bars: 50µm.

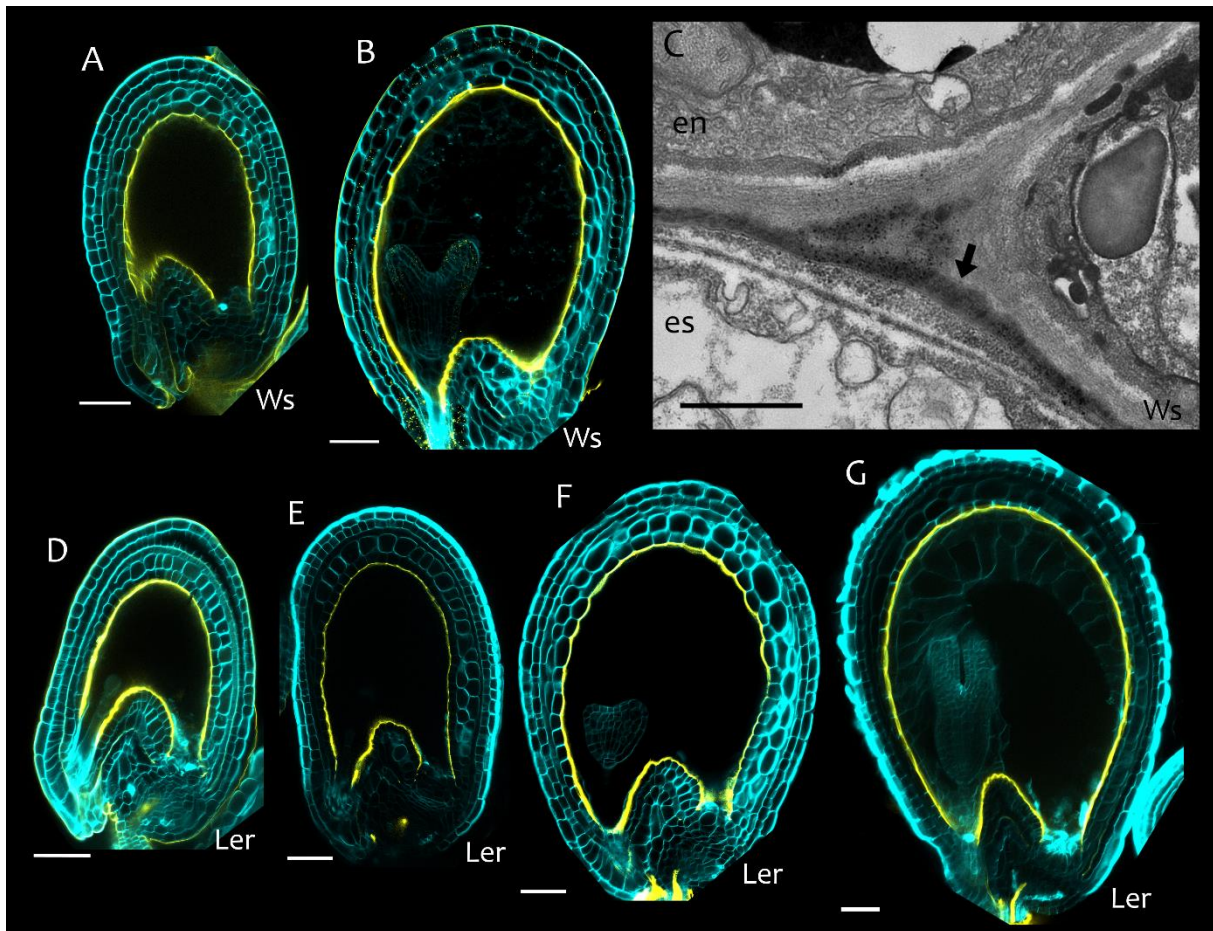

**Figure S2.** Detection of the IAB in different *Arabidopsis* ecotypes.

**(A)** to **(B)** and **(D)** to **(G)** Fluorescence images of longitudinal sections of seeds stained with auramine O (yellow) and counterstained with calcofluor (cyan). **(A)** to **(C)** Ecotype Ws.. **(D)** to **(G)** Ecotype Ler..

**(C)** Transmission electron micrograph showing the electron-dense IAB in a Ws seed at globular embryo stage of seed development. The black arrow indicates the IAB. en, endothelium; es, endosperm.

Scale bars: **(A)** to **(B)** and **(D)** to **(G)** 50µm, **(C)** 1µm.

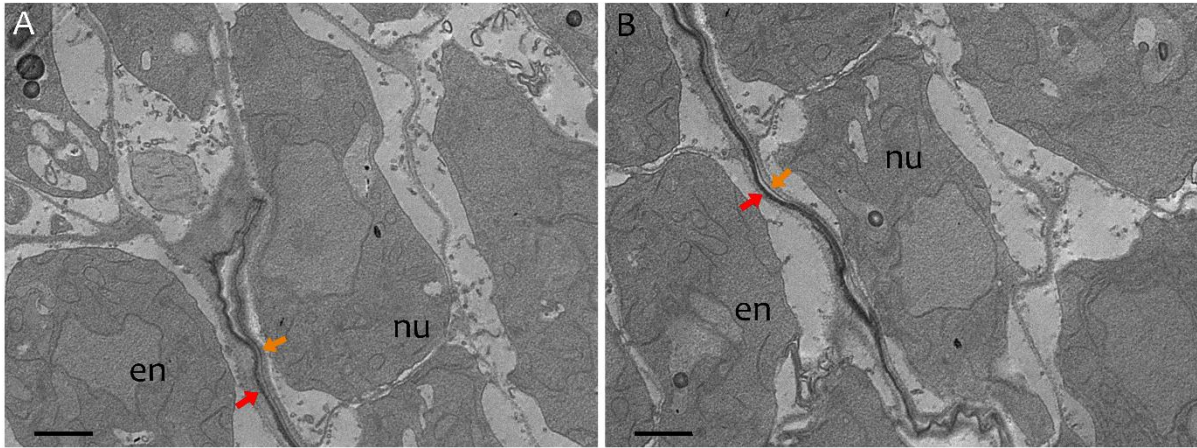

**Figure S3.** The ovule IAB is made of nucellus and endothelium apoplastic barriers.

**(A)** and **(B)** Transmission electron micrographs showing the electron-dense apoplastic barriers separating endothelium and nucellus in wild type ovules. **(A)** IAB proximal region. **(B)** IAB distal region. Red and orange arrows indicate the apoplastic barriers of the endothelium and the nucellus, respectively. en, endothelium; nu, nucellus. Scale bars: 1 $\mu$ m.



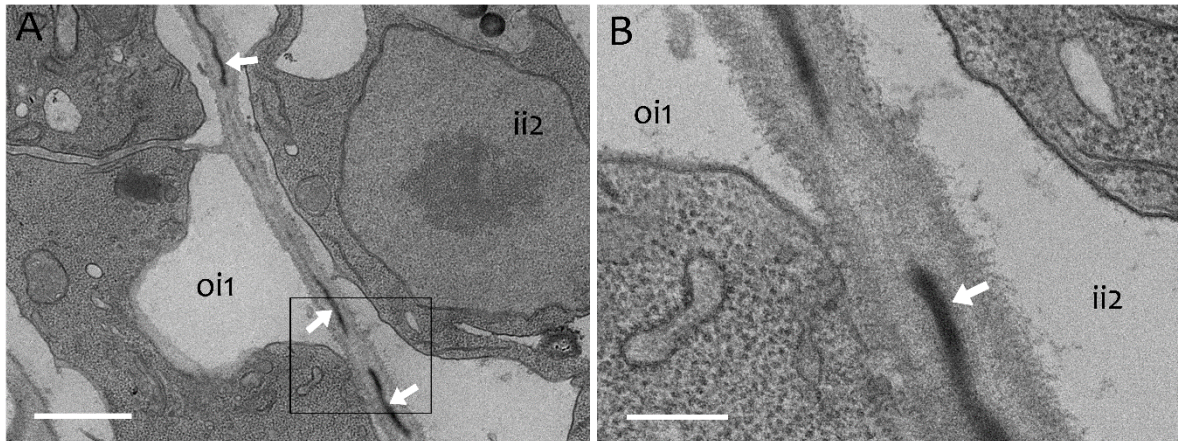

**Figure S4.** Detection of the MAB in ovules.

**(A)** Transmission electron micrographs showing the electron-dense MAB in a mature wild type ovule (stage 3-VI). **(B)** Close-up image of **(A)**. White arrows indicate the MAB. ii2, inner integument 2 cell layer; oi1, outer integument 1 cell layer. Scale bars: **(A)** 1 $\mu$ m, **(B)** 0,25 $\mu$ m.

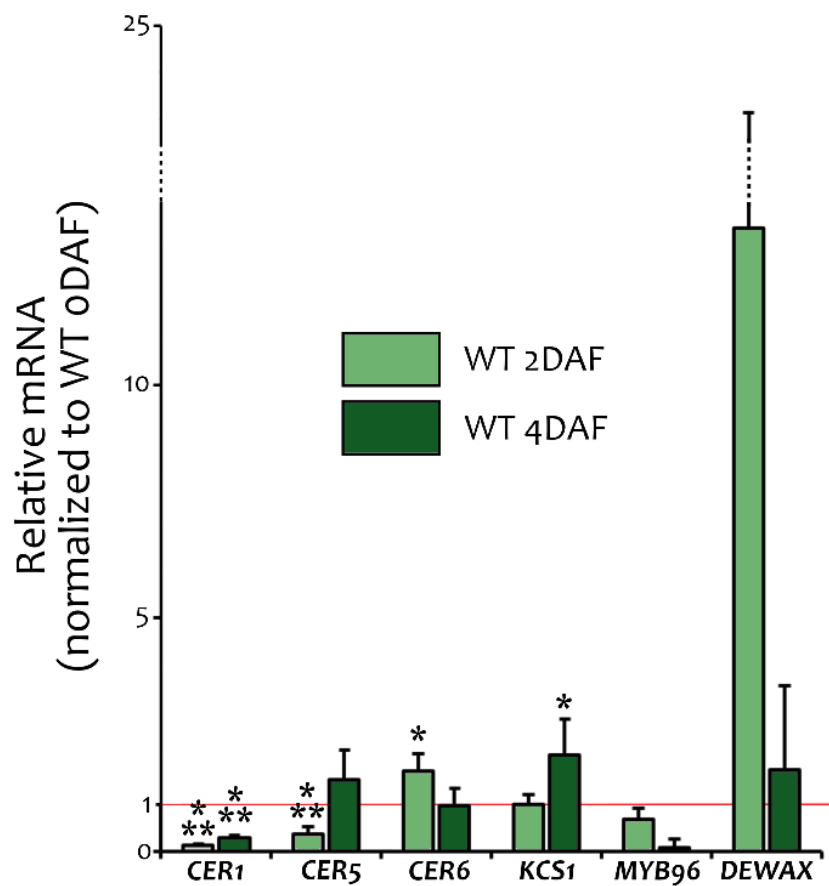

**Figure S5.** Expression of a set of genes involved in VLCFA deposition in ovules and seeds. RT-qPCR analyses of genes involved in VLCFA deposition in wild type seeds at 2 and 4 DAF. Values are relative to wild type. Error bars represent standard deviations. Asterisks indicate statistical difference between different time points (Student's t test, \*:  $P < 0.05$ ; \*\*:  $P < 0.01$ ; \*\*\*:  $P < 0.001$ ). Ecotype Col.

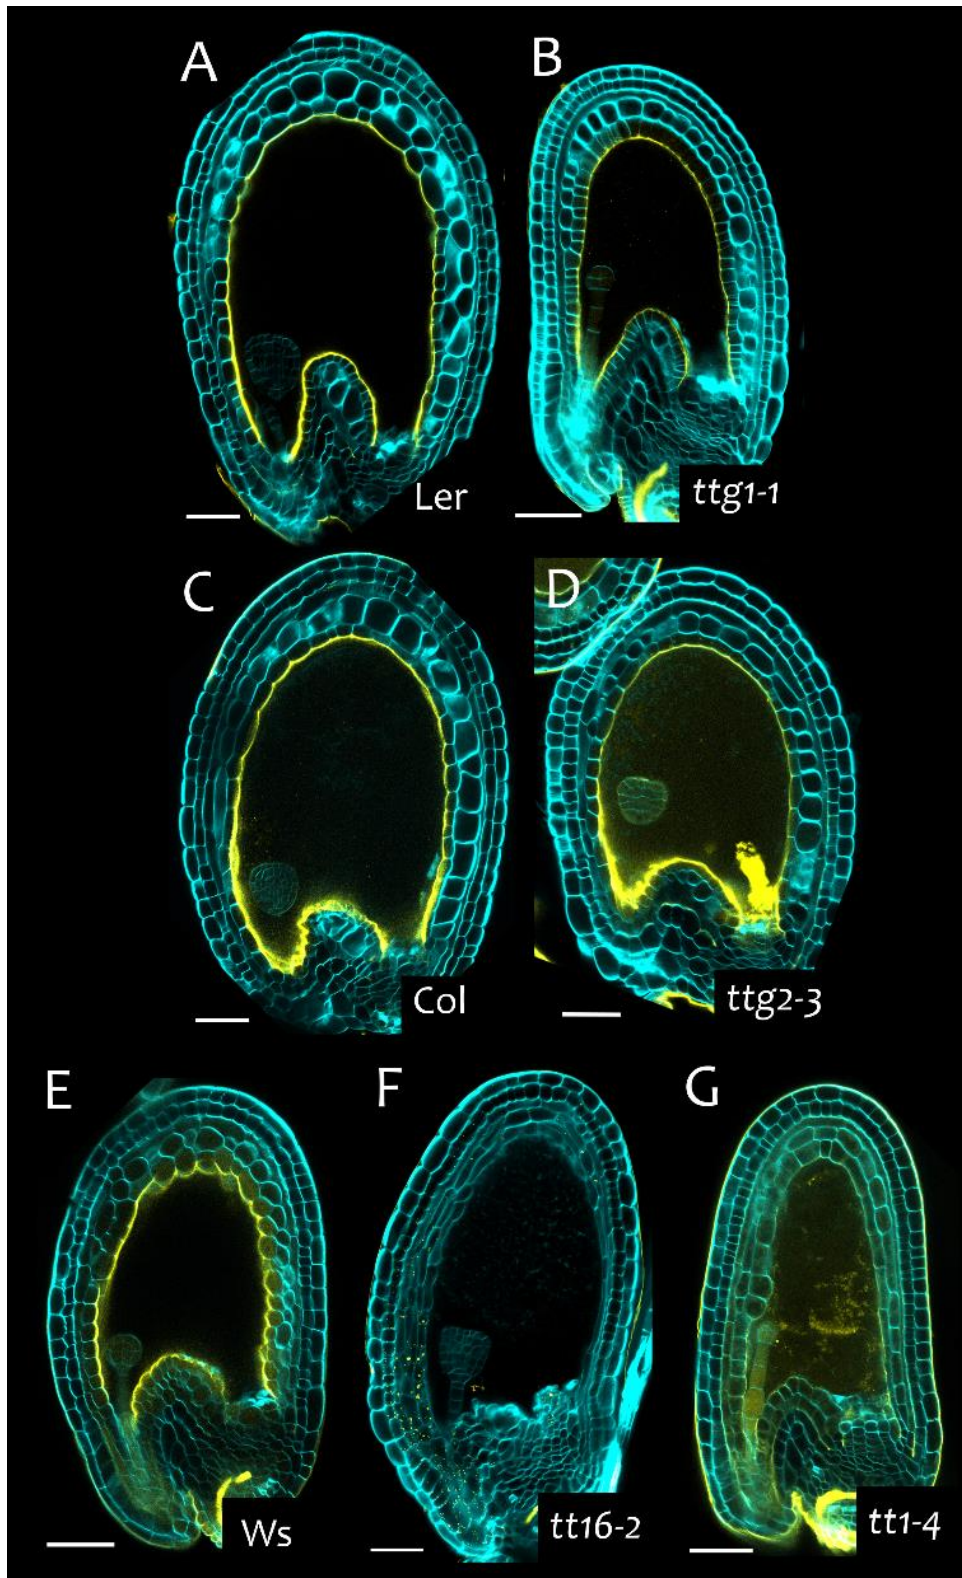

**Figure S6.** IAB deposition in *tt* mutant seeds.

(A) to (G) Fluorescence images of longitudinal sections of seeds stained with auramine O (yellow) and counterstained with calcofluor (cyan). (A) Wild type Ler. (B) *ttg1-1* (Ler). (C) Wild type Col. (D) *ttg2-3* (Col). (E) Wild type Ws. (F) *tt16-2* (Ws). (G) *tt1-4* (Ws). Scale bars: 50μm.

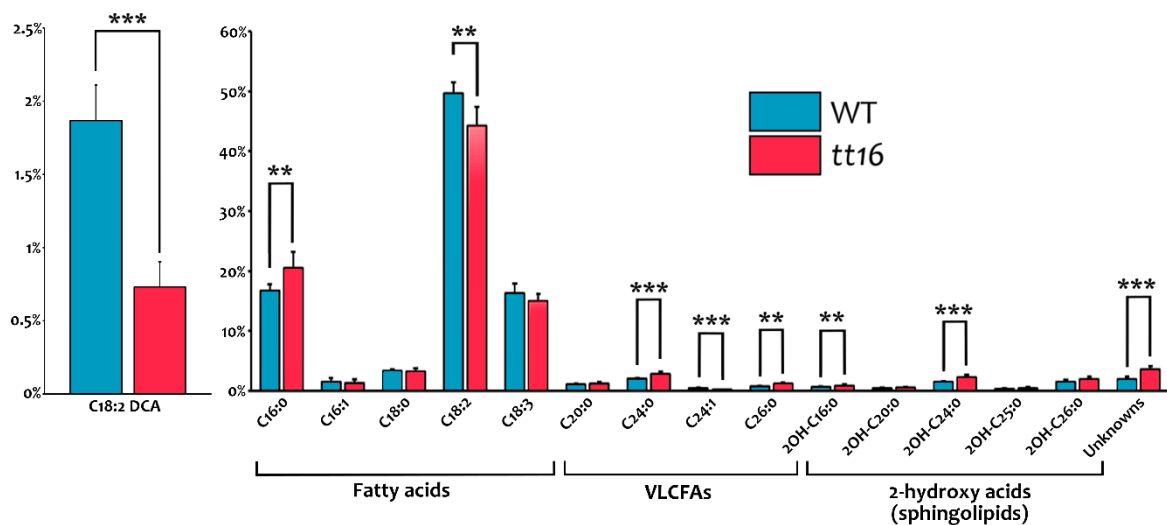

**Figure S7.** *tt16* seeds display an altered C18:2 DCA composition.

A biological replica of the GC-MS analysis of the fatty acyl composition of wild type and *tt16* seeds at 4 DAF in Figure 4. Values are relative to all detected fatty acyl chains. Error bars represent standard deviations. Asterisks indicate statistical difference between different genotypes (Student's t test, \*: P<0.05; \*\*: P<0.01; \*\*\*: P<0.001). Ecotype Col. The complete statistical analysis is in Additional Table 3.

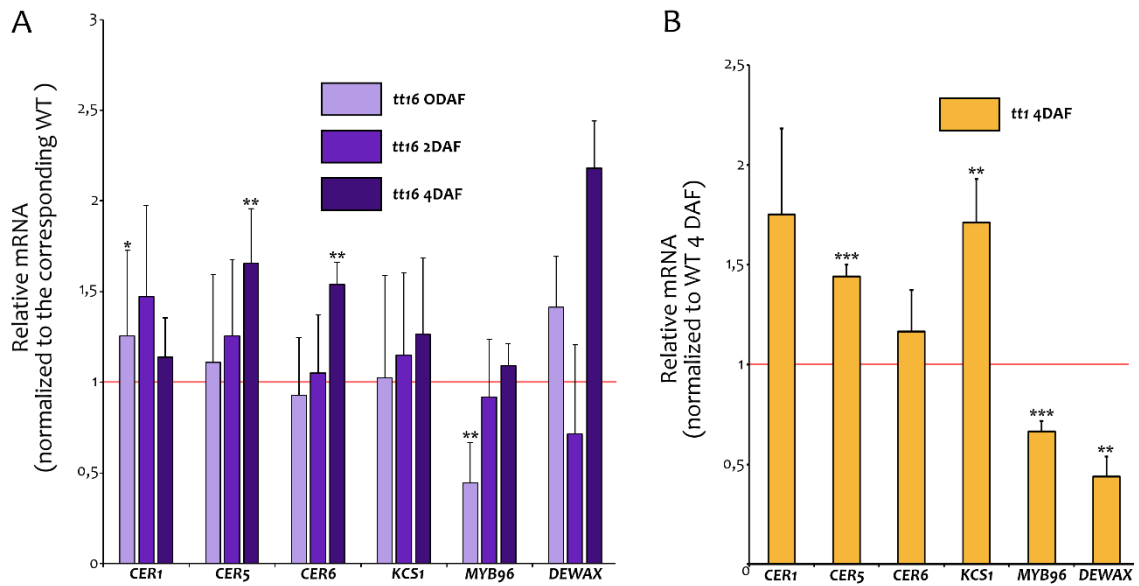

**Figure S8.** *tt16* and *tt1* seeds exhibit altered expression of genes involved in VLCFA deposition. **(A)** and **(B)** RT-qPCR analyses of genes involved in VLCFA deposition in *tt16* ovules and seeds at 0, 2 and 4 DAF and in *tt1* seeds at 4DAF. Values are relative to wild type. Error bars represent standard deviations. Asterisks indicate statistical difference between mutant and wild type at the same time point (Student's t test, \*:  $P < 0.05$ ; \*\*:  $P < 0.01$ ; \*\*\*:  $P < 0.001$ ). Ecotype Col.



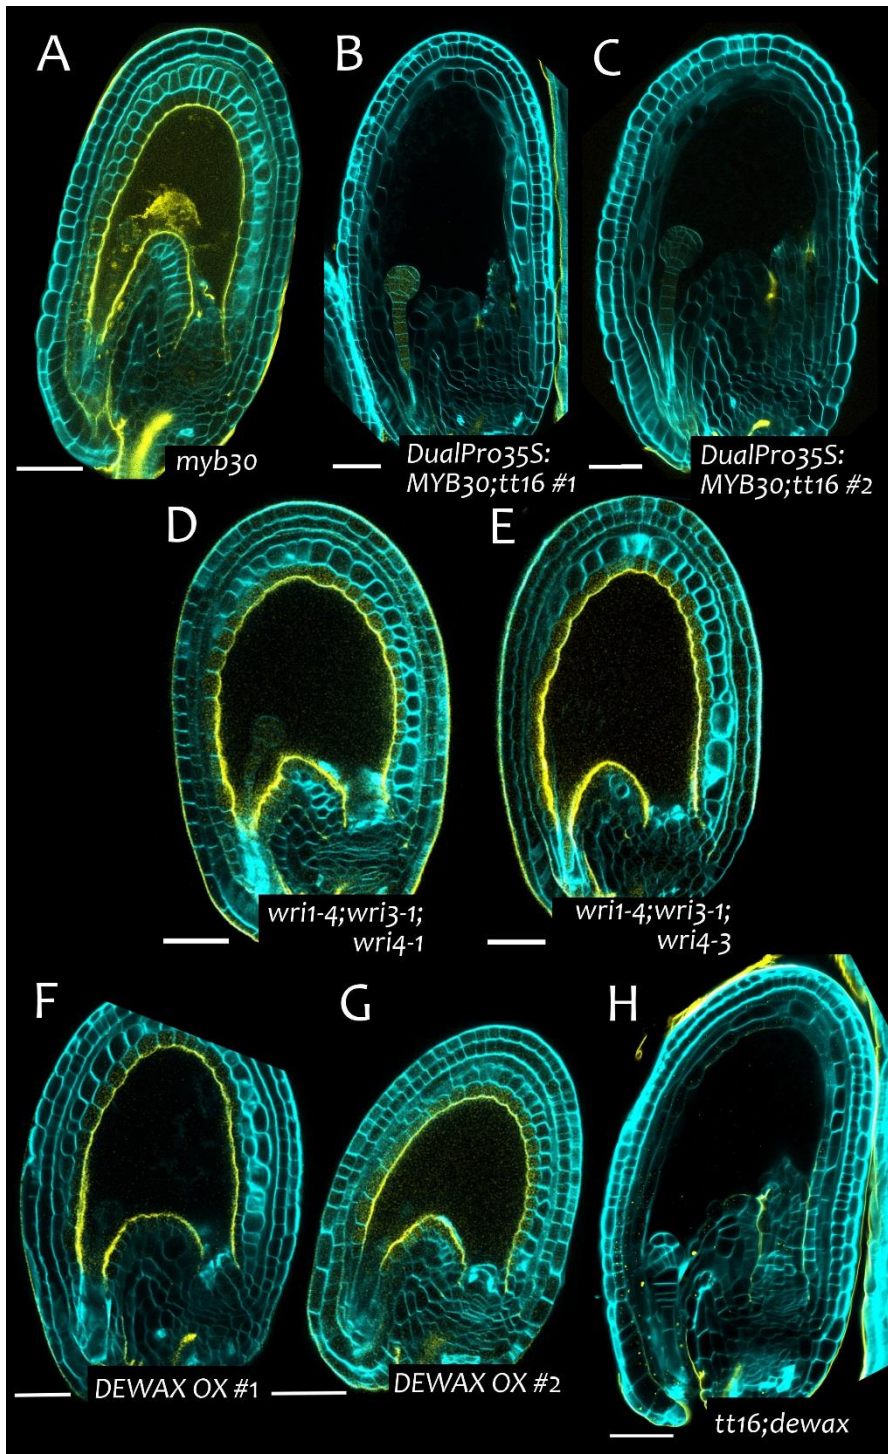

**Figure S9.** IAB deposition in mutant and over-expression lines of genes

involved in cutin and wax deposition.

**(A)** to **(H)** Fluorescence images of longitudinal sections of seeds stained with auramine O (yellow) and counterstained with calcofluor (cyan). **(A)** *myb30* mutant seed. **(B)** and **(C)** Seeds from two independent *Pro35S:cMYB30;tt16* lines. **(D)** *wri1-4;wri3-1;wri4-1* triple mutant seed. **(E)** *wri1-4;wri3-1;wri4-3* triple mutant seed. **(F)** and **(G)** Seeds from two independent *Pro35S:cDEWAX* lines. **(H)** *tt16;dewax* double mutant seed. Scale bars: 50µm.

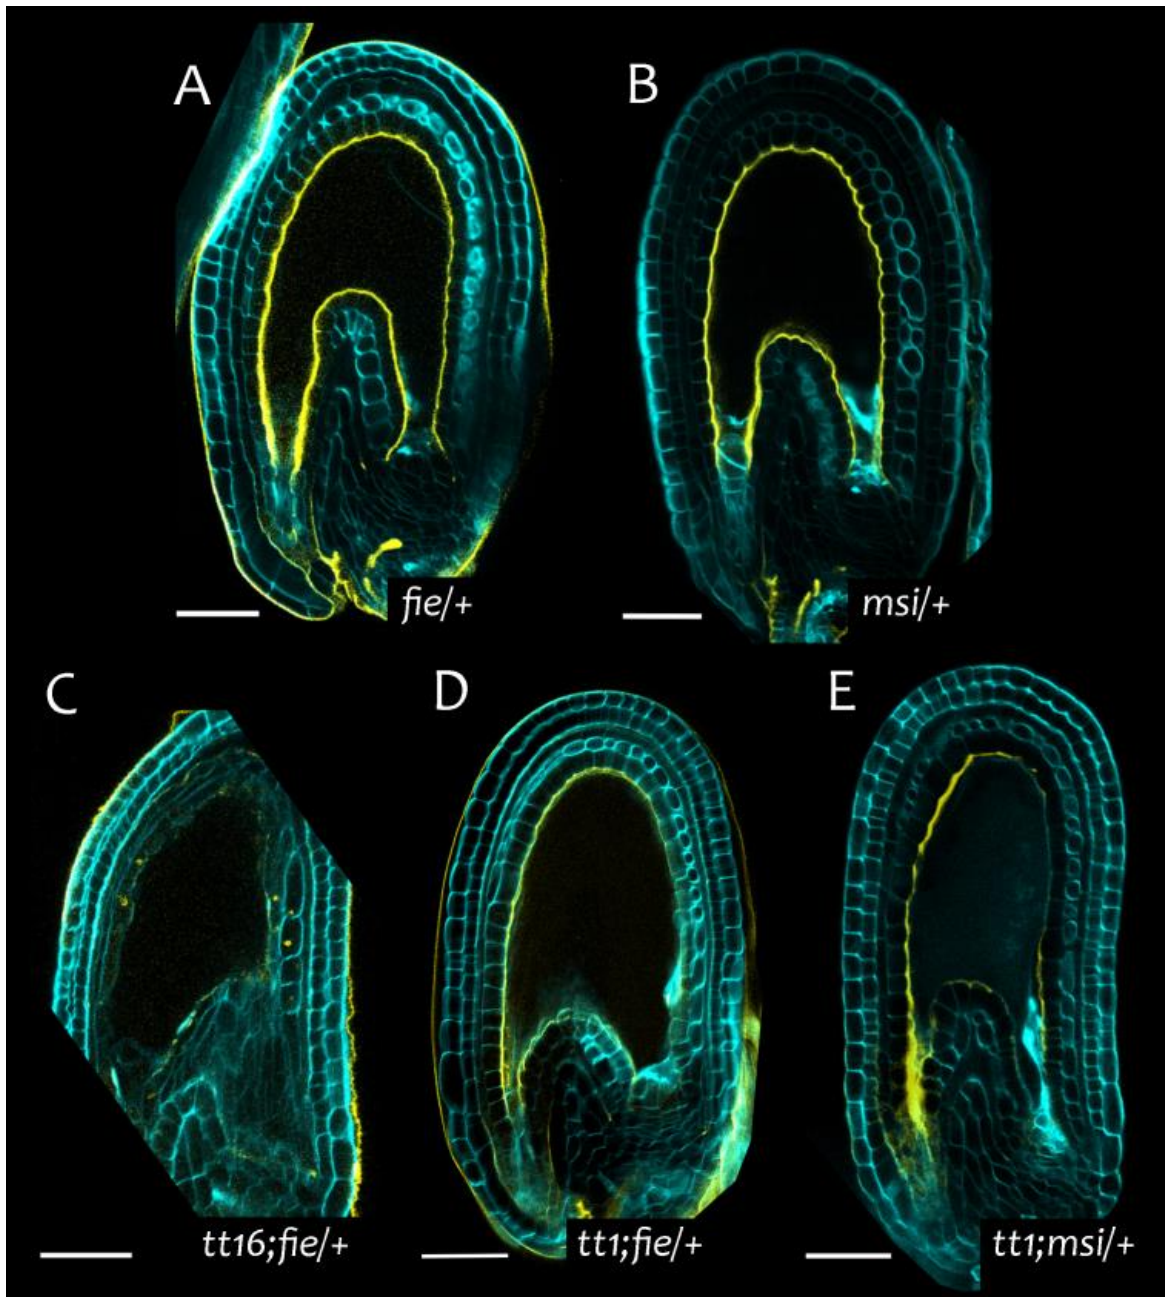

**Figure S10.** IAB deposition is repressed by FIE and MSI1 FIS-PcG proteins.

(A) to (E) Fluorescence images of longitudinal sections of large autonomously-developed seeds at 6DAE. (A) *fie/+*. (B) *msi1/+*. (C) *tt16;fie/+*. (D) *tt1;fie/+*. (E) *tt1;msi1/+*. Scale bars: 50µm.

**Table S1. Primers****Cloning*****pTT1 in pGWB2***

|                  |                                           |
|------------------|-------------------------------------------|
| pGWB2-pTT1-F     | TGATTACGCCAAGCTATACAGTATATTAGAAGTAATACTTG |
| pGWB2-TT1bfATG-R | TGTTGATAACTCTAGTGAATGTGGTGAATAGTTGTTGG    |

***NTF in pDONR207***

|          |                                                           |
|----------|-----------------------------------------------------------|
| B1-NTF-F | GGGGACAAGTTTGTACAAAAAAGCAGGCTCTATGGATCATTGAGCGAAAACCCACAC |
| B2-NTF-R | GGGGACCACTTTGTACAAGAAAGCTGGGTCTCAAGATCCACCAGTATCCTCATGC   |

***cMYB30 in pDONR207***

|             |                                                       |
|-------------|-------------------------------------------------------|
| B1-cMYB30-F | GGGGACAAGTTTGTACAAAAAAGCAGGCTATGGTGAGGCCTCCTTGTGT     |
| B2-cMYB30-R | GGGGACCACTTTGTACAAGAAAGCTGGGTCTCAGAAGAAATTAGTGTTCATCC |

***pMYB30:gMYB30 in pDONR207***

|                   |                                                                |
|-------------------|----------------------------------------------------------------|
| B2-pMYB30-F2      | GGGGACCACTTTGTACAAGAAAGCTGGGTCTCAGAAGAAATTAGTGTTCATCC          |
| B2-MYB30nosto p-R | GGGGACCACTTTGTACAAGAAAGCTGGGTCTCAGAAGAAATTAGTGTTCATCCA<br>ATAG |

**RT-qPCR****Reference genes**

|               |                              |               |                            |
|---------------|------------------------------|---------------|----------------------------|
| GAPDH-Q-F     | GGTACGACAACGAATGGGGT         | GAPDH-Q-R     | TGACTGCGCATGGAATCAGT       |
| AT3G25800-Q-F | AATCGGTTGTGGAGAAGACG         | AT3G25800-Q-R | GCGAAAAACCTGACATCAAC<br>AT |
| AT4G02080-Q-F | GCTGTGTTATTATTAAGCCGTAA<br>G | AT4G02080-Q-R | AAAGCTAGGTACGGTTTAAGA<br>C |
| AT4G12590-Q-F | GAGATGAAAATGCCATTGATGA<br>C  | AT4G12590-Q-R | GCACCCAGACTCTTTGATG        |

**Target genes**

|           |                       |           |                       |
|-----------|-----------------------|-----------|-----------------------|
| ATT1-Q-F  | CGTGTTCCATGACTTCCTCG  | ATT1-Q-R  | AGAATTGGACAAAACCGGAGC |
| BDG-Q-F   | GTTAAACACCCAGGAGCCATC | BDG-Q-R   | GACTGACTGTGCGGCTAATG  |
| DCR-Q-F   | AGCCCAATCCATCTCGACTC  | DCR-Q-R   | CGCCAGATGTGTGATGTCAG  |
| GPAT4-Q-F | TCATCTCCTTCGCCGGTATC  | GPAT4-Q-R | CGCAGTCACCACTACTTTCC  |
| FATB-Q-F  | CGTTCTGACATGCTGGTGG   | FATB-Q-R  | AACCCATCTCCAAGCAATCC  |
| LACS2-Q-F | GCAGCAATTCGGTCCAGG    | LACS2-Q-R | ACGCCAGTATCCAACAGAGG  |
| WBC11-Q-F | GCAAGCAGACAACAAACCAC  | WBC11-Q-R | CACCGTCAGATCTTGCCAC   |
| WRI1-Q-F2 | ACAACAATGAGCTGGCTTGG  | WRI1-Q-R2 | AAGAAGAAGAGGGTGGGCTC  |
| WRI3-Q-F2 | GCCGTTATCTGAAACTCCCG  | WRI3-Q-R2 | ACCTCCTCTGCCACTAAAGG  |

|            |                       |            |                       |
|------------|-----------------------|------------|-----------------------|
| WRI4-Q-F3  | GGCAAAAGTCTCTGGGAGGA  | WRI4-Q-R3  | CGTTGAAGAGGAGCGTTTCG  |
| CER1-Q-F   | GCTACCATTCCCACCACCAC  | CER1-Q-R   | AGTTGCAGTGTCCCATGTTG  |
| CER5-Q-F   | GACACCAGCTACATCAGATCC | CER5-Q-R   | AGCTGCTTAAACCACGTCG   |
| CER6-Q-F   | CCCTCAAGGCAAACATCACC  | CER6-Q-R   | GGACGTGAGGAAGAGAAGTTG |
| KCS1-Q-F   | GTTTTGACCCTCTACGTGGC  | KCS1-Q-R   | TTTGCTGGAAGTGAACCGTG  |
| MYB30-Q-F4 | CGCTCTCATCTTCACCATCG  | MYB30-Q-R4 | TCAGCAGAGGAAGACGTTGT  |
| MYB96-Q-F2 | CCACAACCACCACTACAAGC  | MYB96-Q-R2 | TCCACCTTCTTCCGAGACTG  |
| DEWAX-Q-F  | CCGAAACTGGAACCTAGTTCA | DEWAX-Q-R  | TTCTTTGCCGGATCTCGAATC |

### **RNA *in situ* hybridization**

|            |                            |               |                                                             |
|------------|----------------------------|---------------|-------------------------------------------------------------|
| AntiTT1-F  | ATGGAGTCACCACCACTATA       | T7-AntiTT1-R  | TGTAATACGACTCACTATAGGGCGCAT<br>A<br>CATGGCAAGAAAAAT         |
| AntiHis4-F | CATCTCAATCTCAATTAATC<br>TT | T7-AntiHis4-R | TGTAATACGACTCACTATAGGGCATA<br>C<br>TA<br>AACAAGCATCGAGAAACT |



**Table S2.** Solutions

|                                                                                                                                                                                                                                                                                                    |
|----------------------------------------------------------------------------------------------------------------------------------------------------------------------------------------------------------------------------------------------------------------------------------------------------|
| <b>GUS staining</b>                                                                                                                                                                                                                                                                                |
| <b>Solution n°1</b><br>0.052g of X-Gluc in 500 µL of dimethylformamide,<br>diluted in 50 mL of NaH <sub>2</sub> PO <sub>4</sub> 28 mM, Na <sub>2</sub> HPO <sub>4</sub> 72 mM, EDTA 10mM pH 7,5,<br>Triton 0.1X                                                                                    |
| <b>TEM preparation</b>                                                                                                                                                                                                                                                                             |
| <b>Solution n°2 (Fixation)</b><br>Glutaraldehyde (Sigma, 2%), fresh formaldehyde (Sigma, 0.5%) in cacodylate<br>buffer 0.1 M at pH 7                                                                                                                                                               |
| <b>RNA <i>in situ</i> hybridization</b>                                                                                                                                                                                                                                                            |
| <b>Solution n°3 (Fixation)</b><br>Fresh formaldehyde (Sigma, 4%), Triton (1%) in PBS 1X buffer                                                                                                                                                                                                     |
| <b>Solution n°4 (Proteinase K solution)</b><br>Proteinase K (Sigma, 1 mg L <sup>-1</sup> ) in Tris (100 mM, pH 7,5) EDTA (50 mM) buffer                                                                                                                                                            |
| <b>Solution n°5 (Acetic anhydride / triethanolamine-HCl)</b><br>Triethanolamine (1.5%) in water (pH adjusted at 8 with HCl), 0.5% acetic<br>anhydride                                                                                                                                              |
| <b>Solution n°6 (Prehybridization buffer)</b><br>De-ionised formamide (50%), 5X SSC, heparin (50 µg mL <sup>-1</sup> ), tRNA (Roche, 100 µg<br>mL <sup>-1</sup> ), Tween (0.02%)                                                                                                                   |
| <b>Solution n°7 (Hybridization buffer)</b><br>TT1 RNA probe (0.4 ng µL <sup>-1</sup> ), de-ionised formamide (50%), Dextran Sulfate<br>(Sigma, 20%), tRNA (Roche, 1 mg mL <sup>-1</sup> ), Tween (0.15%), Ficoll (0.05%), PVP<br>(0.05%), BSA (0.05%), NaCl (0.3 M), Tris pH 8 (10mM), EDTA (1 mM) |
| <b>Solution n°8 (RNase solution)</b><br>RNase (Roche, 20 µg mL <sup>-1</sup> ) in NTE                                                                                                                                                                                                              |
| <b>Solution n°9 (Wash buffer n°1 before detection)</b><br>Tris pH 7.5 (100 mM), NaCl (150 mM), Blocking reagent (Roche, 0.5 %)                                                                                                                                                                     |
| <b>Solution n°10 (Wash buffer n°2 before detection)</b><br>Tris pH 7.5 (100 mM), NaCl (150 mM), BSA (Sigma, 1%), Triton 0.5X                                                                                                                                                                       |
| <b>Solution n°11 (Detection)</b><br>Digoxigenin-targeting antibody (Roche), dilution 1/1250 in solution n°10                                                                                                                                                                                       |
| <b>Solution n°12 (Washing and staining buffer)</b><br>Tris pH 9,5 (100 mM), NaCl (100 mM), MgCl <sub>2</sub> (50 mM)                                                                                                                                                                               |
| <b>Solution n°13 (Staining)</b><br>NBT (Nitroblue tetrazolium chloride, Roche, 337.5 µg mL <sup>-1</sup> ), XP (5-bromo-4-chloro-<br>3-indolyl-phosphate, Roche, 175 µg mL <sup>-1</sup> ) in solution n°12                                                                                        |

**Table S3.** Student's t test statistical analysis of GC-MS results.

**GC-MS analysis in Figure 2-A**

|                  | <b>4 DAF vs 0 DAF</b> | <b>8 DAF vs 4 DAF</b> | <b>8 DAF vs 0 DAF</b> |
|------------------|-----------------------|-----------------------|-----------------------|
| <b>C16:0</b>     | 4,05E-01              | 2,49E-01              | 7,60E-02              |
| <b>C16:1</b>     | 8,10E-01              | <b>2,03E-02</b>       | 5,16E-02              |
| <b>C16:3</b>     | 6,06E-01              | 7,35E-01              | 1,28E-01              |
| <b>C18:0</b>     | <b>4,75E-04</b>       | <b>8,71E-05</b>       | <b>2,89E-03</b>       |
| <b>C18:2</b>     | <b>2,61E-02</b>       | <b>1,39E-02</b>       | <b>4,62E-01</b>       |
| <b>C18:3</b>     | 1,87E-01              | 9,18E-01              | 4,37E-01              |
| <b>C20:0</b>     | <b>8,18E-04</b>       | <b>3,55E-03</b>       | 3,33E-01              |
| <b>C22:0</b>     | 1,00E-01              | 2,45E-01              | 7,54E-01              |
| <b>C23:0</b>     | <b>3,34E-03</b>       | <b>1,18E-02</b>       | 7,07E-02              |
| <b>C24:0</b>     | 4,12E-01              | 8,92E-01              | 5,09E-01              |
| <b>C24:1</b>     | <b>1,61E-02</b>       | 9,86E-01              | 4,38E-01              |
| <b>C25:0</b>     | <b>3,08E-03</b>       | <b>2,79E-03</b>       | <b>3,88E-02</b>       |
| <b>C26:0</b>     | 5,20E-01              | <b>3,19E-02</b>       | 8,75E-02              |
| <b>C18:2 DCA</b> | <b>2,66E-02</b>       | <b>1,70E-02</b>       | <b>2,09E-02</b>       |
| <b>2OH-C16</b>   | 1,31E-01              | <b>1,04E-02</b>       | 1,08E-01              |
| <b>2OH-C22</b>   | <b>6,32E-03</b>       | <b>2,92E-04</b>       | <b>1,80E-03</b>       |
| <b>2OH-C24:0</b> | <b>1,64E-02</b>       | <b>1,42E-02</b>       | <b>5,63E-03</b>       |
| <b>2OH-C24:1</b> | 1,62E-01              | <b>7,37E-04</b>       | <b>7,72E-03</b>       |
| <b>2OH-C25:0</b> | 1,07E-01              | 1,95E-01              | 4,53E-01              |
| <b>2OH-C26:0</b> | 1,45E-01              | 9,60E-01              | 7,49E-01              |
| <b>Unknown</b>   | <b>4,39E-01</b>       | <b>1,38E-03</b>       | <b>1,60E-01</b>       |

**GC-MS analysis in Figure 4**

|                  | <b>WT vs <i>tt16</i></b> | <b>WT vs <i>tt1</i></b> |
|------------------|--------------------------|-------------------------|
| <b>C16:0</b>     | 4,70E-01                 | 8,96E-01                |
| <b>C16:1</b>     | 3,50E-01                 | <b>4,02E-01</b>         |
| <b>C16:3</b>     | 9,34E-01                 | 7,99E-01                |
| <b>C18:0</b>     | <b>5,76E-02</b>          | <b>3,38E-03</b>         |
| <b>C18:2</b>     | <b>4,90E-02</b>          | <b>5,63E-02</b>         |
| <b>C18:3</b>     | 1,12E-01                 | 1,77E-01                |
| <b>C20:0</b>     | <b>3,53E-03</b>          | <b>3,47E-01</b>         |
| <b>C22:0</b>     | 4,41E-01                 | 9,93E-01                |
| <b>C23:0</b>     | <b>1,21E-02</b>          | <b>9,92E-02</b>         |
| <b>C24:0</b>     | 1,45E-01                 | 5,71E-01                |
| <b>C24:1</b>     | <b>3,78E-04</b>          | <b>5,12E-04</b>         |
| <b>C25:0</b>     | <b>3,11E-02</b>          | <b>2,57E-01</b>         |
| <b>C26:0</b>     | 4,73E-01                 | <b>2,04E-01</b>         |
| <b>C18:2 DCA</b> | <b>2,75E-03</b>          | <b>1,83E-03</b>         |
| <b>2OH-C16</b>   | 8,40E-02                 | <b>7,87E-02</b>         |
| <b>2OH-C22</b>   | <b>8,89E-01</b>          | <b>3,20E-01</b>         |

|                  |                 |                 |
|------------------|-----------------|-----------------|
| <b>2OH-C24:0</b> | <b>3,38E-01</b> | <b>7,53E-01</b> |
| <b>2OH-C24:1</b> | 4,26E-01        | <b>1,25E-01</b> |
| <b>2OH-C25:0</b> | 5,39E-02        | 3,90E-01        |
| <b>2OH-C26:0</b> | 9,63E-01        | 1,19E-01        |
| <b>Unknown</b>   | <b>4,05E-01</b> | <b>3,26E-01</b> |

**GC-MS analysis in Additional Figure 6**

|                  | <b>WT vs <i>tt16</i></b> |
|------------------|--------------------------|
| <b>C16:0</b>     | 9,30E-03                 |
| <b>C16:1</b>     | 7,43E-01                 |
| <b>C18:0</b>     | <b>6,68E-01</b>          |
| <b>C18:2</b>     | <b>4,19E-03</b>          |
| <b>C18:3</b>     | 1,43E-01                 |
| <b>C20:0</b>     | <b>4,33E-01</b>          |
| <b>C24:0</b>     | 2,64E-04                 |
| <b>C24:1</b>     | <b>2,29E-04</b>          |
| <b>C26:0</b>     | 5,06E-03                 |
| <b>C18:2 DCA</b> | <b>2,84E-06</b>          |
| <b>2OH-C16</b>   | 1,27E-03                 |
| <b>2OH-C22</b>   | <b>1,44E-01</b>          |
| <b>2OH-C24:0</b> | <b>7,70E-04</b>          |
| <b>2OH-C25:0</b> | 1,17E-01                 |
| <b>2OH-C26:0</b> | 9,98E-02                 |
| <b>Unknowns</b>  | <b>1,99E-04</b>          |
